# Supplementary material for: The mechanism of the plant roots’ soil-reinforcement based on generalized equivalent confining pressure
Source: PeerJ. 2020 Sep 29;8:e10064. doi: 10.7717/peerj.10064 (PMC7531344; doi:10.7717/peerj.10064)
Supplement: Supplemental Information 1 [file peerj-08-10064-s001.xlsx]

## Sheet: Experimental data
Drainage condition	Confining pressure (kPa)	Root distribution patterns	Root content (%)	Repeat	Value	Average			Drainage condition	Confining pressure (kPa)	HR			VR			CR			Un-reinforced soil
CD	50	HR	0.0025	1	140.96	141.733					0.25%	0.50%	0.75%	0.25%	0.50%	0.75%	0.25%	0.50%	0.75%	0
				2	142.1				CD	50	141.733	169.133	217.167	158.423	187.813	256.8	179.807	219.207	253.283	133.833
				3	142.14					100	258.307	293.217	365.15	274.333	308.047	415.107	300.717	359.227	425.583	243.523
			0.005	1	168.65	169.133				150	373.843	416.97	514.693	390.537	427.927	575.213	420.987	500.643	587.94	353.523
				2	169.02				CU	50	125.227	139.453	165.473	134.927	171.133	193.943	150.023	181.837	228.697	121.933
				3	169.73					100	231.023	246.027	282.57	240.723	280.837	317.323	252.073	294.727	363.853	224.147
			0.0075	1	217.57	217.167				150	339.757	352.043	398.737	343.077	390.98	439.3	354.067	409.013	493.833	326.853
				2	216.98				UU	50	107.817	109.433	113.753	107.63	110.977	111.257	107.573	111.897	122.347	113.787
				3	216.95					100	181.47	184.383	187.16	182.393	183.263	188.683	180.197	187.827	198.373	188.883
		VR	0.0025	1	158.32	158.423				150	250.78	259.517	261.01	256.787	257.243	271.727	253.173	264.757	274.283	264.143
				2	157.31
				3	159.64				Notes:
			0.005	1	186.13	187.813			CD denotes the consolidation drained condition; CU denotes the consolidation undrained condition; UU denotes the unconsolidated undrained condition; HR is horizontal root; VR is vertical root; CR is complex root.
				2	187.45
				3	189.86
			0.0075	1	255.34	256.8
				2	257.12
				3	257.94
		CR	0.0025	1	178.8	179.807
				2	180.11
				3	180.51
			0.005	1	218.98	219.207
				2	219.86
				3	218.78
			0.0075	1	254.23	253.283
				2	253.57
				3	252.05
		Un-reinforced soil	0	1	133.84	133.833
				2	132.16
				3	135.5
	100	HR	0.0025	1	258.31	258.307
				2	257.95
				3	258.66
			0.005	1	294.25	293.217
				2	292.47
				3	292.93
			0.0075	1	365.12	365.15
				2	364.95
				3	365.38
		VR	0.0025	1	274.34	274.333
				2	274.11
				3	274.55
			0.005	1	306.24	308.047
				2	310.44
				3	307.46
			0.0075	1	416.25	415.107
				2	415.29
				3	413.78
		CR	0.0025	1	299.56	300.717
				2	301.2
				3	301.39
			0.005	1	359.19	359.227
				2	359.67
				3	358.82
			0.0075	1	425.59	425.583
				2	424.79
				3	426.37
		Un-reinforced soil	0	1	242.89	243.523
				2	244.56
				3	243.12
	150	HR	0.0025	1	374.95	373.843
				2	373.01
				3	373.57
			0.005	1	416.45	416.97
				2	417.59
				3	416.87
			0.0075	1	514.56	514.693
				2	515.48
				3	514.04
		VR	0.0025	1	389.88	390.537
				2	390.64
				3	391.09
			0.005	1	426.01	427.927
				2	428.56
				3	429.21
			0.0075	1	576.28	575.213
				2	576.13
				3	573.23
		CR	0.0025	1	421.39	420.987
				2	422.21
				3	419.36
			0.005	1	498.9	500.643
				2	500.59
				3	502.44
			0.0075	1	588.24	587.94
				2	589.47
				3	586.11
		Un-reinforced soil	0	1	354.45	353.523
				2	352.97
				3	353.15
CU	50	HR	0.0025	1	126.89	125.227
				2	124.33
				3	124.46
			0.005	1	138.46	139.453
				2	139.99
				3	139.91
			0.0075	1	165.24	165.473
				2	166.25
				3	164.93
		VR	0.0025	1	136.12	134.927
				2	133
				3	135.66
			0.005	1	171.13	171.133
				2	170.26
				3	172.01
			0.0075	1	194.56	193.943
				2	194.23
				3	193.04
		CR	0.0025	1	148.32	150.023
				2	150.57
				3	151.18
			0.005	1	182.12	181.837
				2	180.44
				3	182.95
			0.0075	1	227.56	228.697
				2	228.45
				3	230.08
		Un-reinforced soil	0	1	121	121.933
				2	123.26
				3	121.54
	100	HR	0.0025	1	230.87	231.023
				2	232.51
				3	229.69
			0.005	1	248.47	246.027
				2	246.22
				3	243.39
			0.0075	1	281.47	282.57
				2	282.59
				3	283.65
		VR	0.0025	1	240.76	240.723
				2	239.98
				3	241.43
			0.005	1	282.3	280.837
				2	279.05
				3	281.16
			0.0075	1	319.26	317.323
				2	317.69
				3	315.02
		CR	0.0025	1	252.67	252.073
				2	254.85
				3	248.7
			0.005	1	292.6	294.727
				2	295.41
				3	296.17
			0.0075	1	362.45	363.853
				2	364.07
				3	365.04
		Un-reinforced soil	0	1	225.14	224.147
				2	224.69
				3	222.61
	150	HR	0.0025	1	338.98	339.757
				2	339.25
				3	341.04
			0.005	1	353.14	352.043
				2	352.69
				3	350.3
			0.0075	1	398.49	398.737
				2	399.13
				3	398.59
		VR	0.0025	1	342.57	343.077
				2	343.68
				3	342.98
			0.005	1	390.94	390.98
				2	389.49
				3	392.51
			0.0075	1	438.55	439.3
				2	439
				3	440.35
		CR	0.0025	1	354.23	354.067
				2	354.04
				3	353.93
			0.005	1	409	409.013
				2	408.89
				3	409.15
			0.0075	1	493.65	493.833
				2	495.12
				3	492.73
		Un-reinforced soil	0	1	326.49	326.853
				2	326.27
				3	327.8
UU	50	HR	0.0025	1	108.58	107.817
				2	107.11
				3	107.76
			0.005	1	110.56	109.433
				2	108.45
				3	109.29
			0.0075	1	113.48	113.753
				2	112.57
				3	115.21
		VR	0.0025	1	108.56	107.63
				2	107
				3	107.33
			0.005	1	111.46	110.977
				2	109.84
				3	111.63
			0.0075	1	111.46	111.257
				2	110
				3	112.31
		CR	0.0025	1	108.48	107.573
				2	106.46
				3	107.78
			0.005	1	110.98	111.897
				2	110.99
				3	113.72
			0.0075	1	121.67	122.347
				2	122.44
				3	122.93
		Un-reinforced soil	0	1	114.89	113.787
				2	113.45
				3	113.02
	100	HR	0.0025	1	182.14	181.47
				2	182.06
				3	180.21
			0.005	1	184.11	184.383
				2	185.64
				3	183.4
			0.0075	1	187.65	187.16
				2	187.16
				3	186.67
		VR	0.0025	1	183.59	182.393
				2	184.01
				3	179.58
			0.005	1	183.19	183.263
				2	184.33
				3	182.27
			0.0075	1	188	188.683
				2	189.56
				3	188.49
		CR	0.0025	1	179.46	180.197
				2	178.22
				3	182.91
			0.005	1	188.75	187.827
				2	186.02
				3	188.71
			0.0075	1	199.64	198.373
				2	198.22
				3	197.26
		Un-reinforced soil	0	1	188.26	188.883
				2	189.65
				3	188.74
	150	HR	0.0025	1	251.46	250.78
				2	250.48
				3	250.4
			0.005	1	260.35	259.517
				2	259.01
				3	259.19
			0.0075	1	260.79	261.01
				2	262.14
				3	260.1
		VR	0.0025	1	257.48	256.787
				2	255.39
				3	257.49
			0.005	1	254.86	257.243
				2	258.11
				3	258.76
			0.0075	1	270.16	271.727
				2	272.63
				3	272.39
		CR	0.0025	1	254.95	253.173
				2	251.23
				3	253.34
			0.005	1	266.15	264.757
				2	263.75
				3	264.37
			0.0075	1	276.15	274.283
				2	275.11
				3	271.59
		Un-reinforced soil	0	1	264.39	264.143
				2	263.22
				3	264.82

## Sheet: Table 1
Table 1:
Shear strength indexes of soil-root composites.
Shear strength indexes
	Root content (%)	CD		CU		UU
		c/kPa	φ/(°)	c/kPa	φ/(°)	c/kPa	φ/(°)
Un-reinforced soil	0	8.24	21.9	6.83	20.1	15.74	11.6
HR	0.0025	7.49	23.4	5.06	20.6	16.71	9.6
	0.005	14.1	25.3	11.41	21.08	14.03	11.4
	0.0075	19.26	30	15.75	23.67	16.43	11.7
VR	0.0025	14.04	23.42	12.56	20.08	15.35	11.2
	0.005	21.69	24.42	20.73	22	13.27	11.4
	0.0075	27.03	31.58	22.94	24.92	11.81	13.5
CR	0.0025	18.98	24.5	16.87	20	14.41	11.3
	0.005	23.27	28.42	22.47	22.92	14.34	12
	0.0075	29	31.75	28.84	27.25	18.82	12.3
Notes:
CD denotes the consolidation drained condition; CU denotes the consolidation undrained condition; UU denotes the unconsolidated undrained condition; HR is horizontal root; VR is vertical root; CR is complex root.

## Sheet: Table 2
Table 2:
Generalized equivalent confining pressure (GECP) of Indigofera amblyantha roots in the reinforced soil.
	Confining pressure (kPa)	HR			VR			CR			Un-reinforced soil
		0.25%	0.50%	0.75%	0.25%	0.50%	0.75%	0.25%	0.50%	0.75%	0
CD	50	141.733	169.133	217.167	158.423	187.813	256.8	179.807	219.207	253.283	133.833
	100	258.307	293.217	365.15	274.333	308.047	415.107	300.717	359.227	425.583	243.523
	150	373.843	416.97	514.693	390.537	427.927	575.213	420.987	500.643	587.94	353.523
CU	50	125.227	139.453	165.473	134.927	171.133	193.943	150.023	181.837	228.697	121.933
	100	231.023	246.027	282.57	240.723	280.837	317.323	252.073	294.727	363.853	224.147
	150	339.757	352.043	398.737	343.077	390.98	439.3	354.067	409.013	493.833	326.853
UU	50	107.817	109.433	113.753	107.63	110.977	111.257	107.573	111.897	122.347	113.787
	100	181.47	184.383	187.16	182.393	183.263	188.683	180.197	187.827	198.373	188.883
	150	250.78	259.517	261.01	256.787	257.243	271.727	253.173	264.757	274.283	264.143
Generalized equivalent confining pressure
	Confining pressure (kPa)	HR			VR			CR
		0.25%	0.5%	0.75%	0.25%	0.5%	0.75%	0.25%	0.5%	0.75%
CD	50	3.60906	16.1266	38.0703	11.2338	24.6604	56.1765	21.0026	39.0023	54.57
	100	6.74617	22.6769	55.5027	14.0597	29.4443	78.2997	26.0994	52.7996	83.0806
	150	9.26059	28.915	73.4513	16.8684	33.9084	101.033	30.7456	67.0481	106.833
CU	50	1.60825	8.55564	21.2621	6.34511	24.0261	35.1651	13.7174	29.2529	52.1364
	100	3.361	10.6939	28.5546	8.10191	27.7075	45.5405	13.6493	34.4963	68.2822
	150	6.29823	12.2955	35.0869	7.91875	31.3008	54.8862	13.2831	40.103	81.5044
UU	50	-3.97003	-2.89495	-0.0221665	-4.09416	-1.86864	-1.68244	-4.13184	-1.25684	5.69237
	100	-4.93285	-2.99431	-1.14671	-4.31846	-3.73956	-0.13308	-5.78013	-0.703108	6.31467
	150	-8.88736	-3.07699	-2.08384	-4.89259	-4.58888	5.04334	-7.29566	0.407901	6.74366
Notes:
CD denotes the consolidation drained condition; CU denotes the consolidation undrained condition; UU denotes the unconsolidated undrained condition; HR is horizontal root; VR is vertical root; CR is complex root.

## Sheet: Figure 3
Figure 3
The relationship between the generalized equivalent confining pressure of Indigofera amblyantha roots in the reinforced soil and root content.
Confining pressure (kPa) Root content		HR			VR			CR
		50	100	150	50	100	150	50	100	150
CD	0.0025	3.60906	6.74617	9.26059	11.2338	14.0597	16.8684	21.0026	26.0994	30.7456
	0.005	16.1266	22.6769	28.915	24.6604	29.4443	33.9084	39.0023	52.7996	67.0481
	0.0075	38.0703	55.5027	73.4513	56.1765	78.2997	101.033	54.57	83.0806	106.833
CU	0.0025	1.60825	3.361	6.29823	6.34511	8.10191	7.91875	13.7174	13.6493	13.2831
	0.005	8.55564	10.6939	12.2955	24.0261	27.7075	31.3008	29.2529	34.4963	40.103
	0.0075	21.2621	28.5546	35.0869	35.1651	45.5405	54.8862	52.1364	68.2822	81.5044
UU	0.0025	-3.97003	-4.93285	-8.88736	-4.09416	-4.31846	-4.89259	-4.13184	-5.78013	-7.29566
	0.005	-2.89495	-2.99431	-3.07699	-1.86864	-3.73956	-4.58888	-1.25684	-0.703108	0.407901
	0.0075	-0.0221665	-1.14671	-2.08384	-1.68244	-0.13308	5.04334	5.69237	6.31467	6.74366
Notes:
CD denotes the consolidation drained condition; CU denotes the consolidation undrained condition; UU denotes the unconsolidated undrained condition; HR is horizontal root; VR is vertical root; CR is complex root.

## Sheet: Figure 4
Figure 4
The relationship between the generalized equivalent confining pressure of Indigofera amblyantha roots in the reinforced soil and drainage conditions.
Confining pressure (kPa)		50			100			150
Root content (%)		0.0025	0.005	0.0075	0.0025	0.005	0.0075	0.0025	0.005	0.0075
HR	UU	-3.97003	-2.89495	-0.0221665	-4.93285	-2.99431	-1.14671	-8.88736	-3.07699	-2.08384
	CU	1.60825	8.55564	21.2621	3.361	10.6939	28.5546	6.29823	12.2955	35.0869
	CD	3.60906	16.1266	38.0703	6.74617	22.6769	55.5027	9.26059	28.915	73.4513
VR	UU	-4.09416	-1.86864	-1.68244	-4.31846	-3.73956	-0.13308	-4.89259	-4.58888	5.04334
	CU	6.34511	24.0261	35.1651	8.10191	27.7075	45.5405	7.91875	31.3008	54.8862
	CD	11.2338	24.6604	56.1765	14.0597	29.4443	78.2997	16.8684	33.9084	101.033
CR	UU	-4.13184	-1.25684	5.69237	-5.78013	-0.703108	6.31467	-7.29566	0.407901	6.74366
	CU	13.7174	29.2529	52.1364	13.6493	34.4963	68.2822	13.2831	40.103	81.5044
	CD	21.0026	39.0023	54.57	26.0994	52.7996	83.0806	30.7456	67.0481	106.833
Notes:
CD denotes the consolidation drained condition; CU denotes the consolidation undrained condition; UU denotes the unconsolidated undrained condition; HR is horizontal root; VR is vertical root; CR is complex root.

## Sheet: Figure 5
Figure 5
The relationship between the generalized equivalent confining pressure of Indigofera amblyantha roots in the reinforced soil and confining pressure.
Root content (%)	Confining pressure (kPa)	CD			CU			UU
		HR	VR	CR	HR	VR	CR	HR	VR	CR
0.0025	50	3.60906	11.2338	21.0026	1.60825	6.34511	13.7174	-3.97003	-4.09416	-4.13184
	100	6.74617	14.0597	26.0994	3.361	8.10191	13.6493	-4.93285	-4.31846	-5.78013
	150	9.26059	16.8684	30.7456	6.29823	7.91875	13.2831	-8.88736	-4.89259	-7.29566
0.005	50	16.1266	24.6604	39.0023	8.55564	24.0261	29.2529	-2.89495	-1.86864	-1.25684
	100	22.6769	29.4443	52.7996	10.6939	27.7075	34.4963	-2.99431	-3.73956	-0.703108
	150	28.915	33.9084	67.0481	12.2955	31.3008	40.103	-3.07699	-4.58888	0.407901
0.0075	50	38.0703	56.1765	54.57	21.2621	35.1651	52.1364	-0.0221665	-1.68244	5.69237
	100	55.5027	78.2997	83.0806	28.5546	45.5405	68.2822	-1.14671	-0.13308	6.31467
	150	73.4513	101.033	106.833	35.0869	54.8862	81.5044	-2.08384	5.04334	6.74366
Notes:
CD denotes the consolidation drained condition; CU denotes the consolidation undrained condition; UU denotes the unconsolidated undrained condition; HR is horizontal root; VR is vertical root; CR is complex root.
